# Supplementary material for: Identifying Women with Post-Delivery Posttraumatic Stress Disorder using Natural Language Processing of Personal Childbirth Narratives
Source: bioRxiv or medRxiv preprint supplement (doi:10.1101/2022.08.30.22279394), 2022-08-30
Supplement: Supplementary file [file media-1.pdf]

## Supplementary Materials

**Manuscript Title:** Identifying Women with Post-Delivery Posttraumatic Stress Disorder using Natural Language Processing of Personal Childbirth Narratives

**Authors:**

Alon Bartal, Ph.D.<sup>1</sup>; Kathleen M. Jagodnik, Ph.D.<sup>1</sup>; Sabrina J. Chan, B.S.<sup>2</sup>; Mrithula S. Babu, M.S.<sup>2</sup>; Sharon Dekel, Ph.D.<sup>2+</sup>

<sup>1</sup>School of Business Administration, Bar-Ilan University, Ramat Gan, Israel

<sup>2</sup>Department of Psychiatry, Massachusetts General Hospital, Boston, Massachusetts, USA

+Corresponding Author: [sdekel@mgh.harvard.edu](mailto:sdekel@mgh.harvard.edu)

---

### Appendix A: Steps to Build and Test the Developed Model

The following four steps describe how we built and tested the developed model (also summarized in Supplemental Figure 1a):

**Step 1. Define a PCL-5 cutoff score.**

We labeled each narrative as *Class 1*: probable CB-PTSD ('CB-PTSD') based on  $PCL-5 \geq 31$ , or *Class 0*: no probable CB-PTSD ('No CB-PTSD') based on  $PCL-5 < 31$  (see also Appendix B: Sensitivity Analysis section for additional tested PCL-5 cutoffs).

**Step 2. Data preparation.**

- 2.1 We discarded narratives with fewer than 30 words from the dataset. To handle imbalance in the analyzed dataset (due to small representation of cases with  $PCL-5 \geq 31$ ), we randomly sampled the majority Class 0 to fit the size of the minority Class 1.
- 2.2 Using the balanced dataset (Step 2.1), we randomly selected 75% of the narratives for training our model, and 25% for testing our model (see also Appendix B: Sensitivity Analysis section for additional assessed train/test splits).

Step 3. *Develop a machine learning classifier that utilizes NLP features.*

Using the train set, we analyzed pairwise narrative (sentence) similarity, following the Siamese networks approach<sup>65</sup> that learns to identify semantically similar pairs of sentences. This approach allowed us to generate multiple training examples since there are  $\frac{n(n-1)}{2}$  possible combinations for  $n$  sentences, thus addressing the challenge of training an ML model with a low number of examples, as in Class 1. The following three steps describe the model development.

- 3.1. Each pair of sentences in Class 1, and each pair of sentences in Class 0, was labeled as **positive examples**, indicating semantically *similar* sentences of individuals with (Set 1), or without (Set 2) CB-PTSD, respectively. Next, **negative examples** (Set 3) of the same size as the positive examples sets ( $|\text{Set 1}| + |\text{Set 2}|$ ) were created by randomly selecting pairs of sentences, one from Class 1, and the other from Class 0, indicating semantically *non-similar* sentences.
- 3.2. Using the `all-mpnet-base-v2` model, each sentence in Class 1 and Class 0 was mapped into a dense vector space. Then, for each Set 1 to 3, we computed a vector  $z$  of the absolute element-wise difference between the embedding (`emb`) vectors of each pair of sentences ( $u, v$ ), selected in Step 3.1, such that  $z = (|\text{emb}(u) - \text{emb}(v)|)$ .
- 3.3. We trained a densely connected feedforward neural network (DFNN) to classify pairs of sentences (by processing vector  $z$ ) as semantically similar, or not (Supplemental Figure 1b).

Step 4. *Test model performance.*

We compared the performance of our model to a baseline model (see Results section) using 10-fold cross-validation (CV), and reported the area under the receiver operating characteristic curve (AUC), F1-score, Sensitivity, and Specificity performance measures on the test set. For testing our model on a newly unseen narrative  $S$  in the test set, we first compute its embeddings using the `all-mpnet-base-v2` model. Next, we compute the average embedding vector ( $\bar{v}_n$ ) of all train narratives in Class 0, and the average embedding vector ( $\bar{v}_p$ ) of all train narratives in Class 1. To decide the class of  $S$ , we compute  $z_n = (|\text{emb}(S) - \bar{v}_n|)$ , and  $z_p = (|\text{emb}(S) - \bar{v}_p|)$ . Then, we apply our model to  $z_n$  and  $z_p$ , and compare its output, i.e., compare the similarity likelihood of  $\text{emb}(S)$  to  $\bar{v}_p$  with the similarity likelihood of  $\text{emb}(S)$  to  $\bar{v}_n$ . If  $z_p > z_n$ , we say that  $S \in \text{Class 1}$ , else  $S \in \text{Class 0}$  (Supplemental Figure 2). Intuitively, our model should assign a larger similarity likelihood between an embedded narrative of an individual with CB-PTSD to vector  $\bar{v}_p$  than to vector  $\bar{v}_n$ .

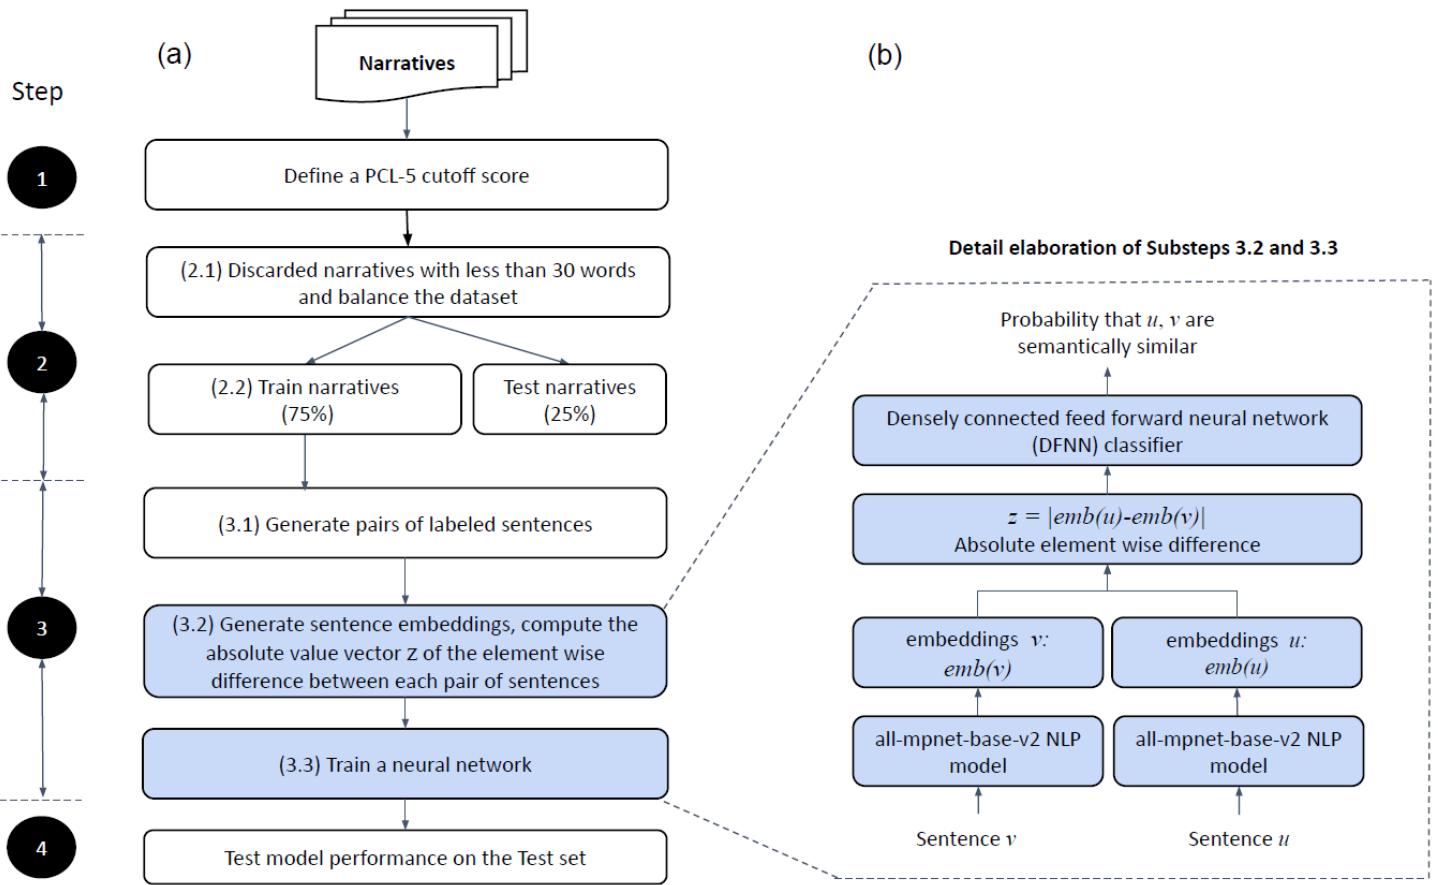

Supplemental Figure 1. Steps of the machine learning classifier model development for the identification of maternal childbirth-related post-traumatic stress disorder (CB-PTSD). (a) Left panel: An illustration summary of the four steps of the model. (b) Right panel: Training a neural network to identify pairwise sentence similarity.

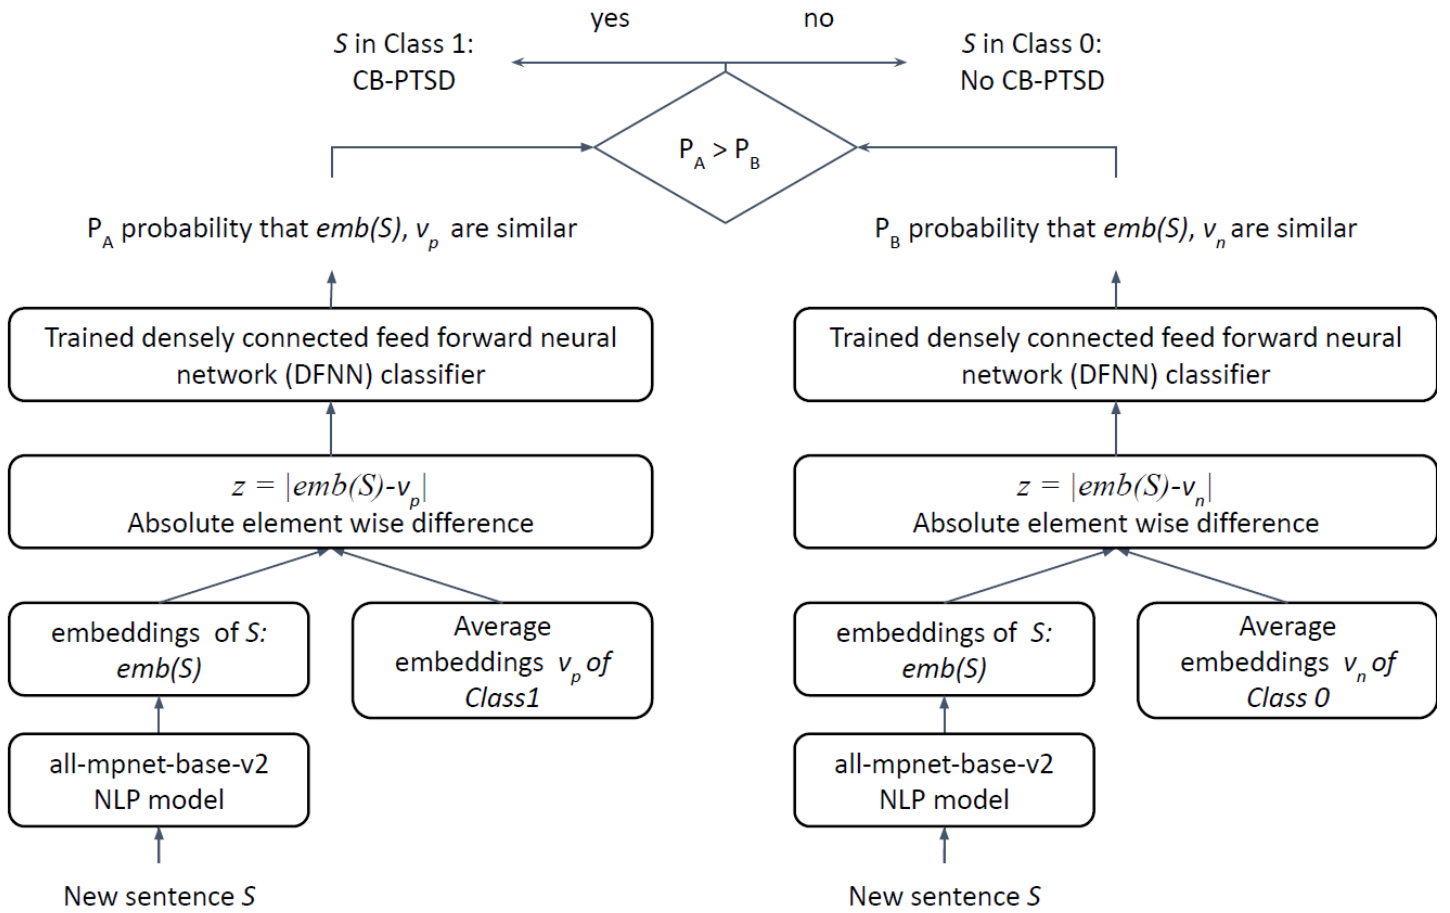

Supplemental Figure 2. Identification of childbirth-related post-traumatic stress disorder (CB-PTSD) using the developed model by classification of a new narrative sentence ( $S$ ) that was not used for model training.

## Appendix B: Sensitivity Analysis

To find the best parameters for the CB-PTSD classification model, the following parameter values were tested:

- (1) **Model training.** We examined train/test splits of 70/30%, 75/25%, 85/15%, and 90/10%. The best results were achieved for 75/25% split.
- (2) **Narrative embeddings.** To find the best narrative embeddings, we tested the following 5 pre-trained Sentence-Transformers models: all-mpnet-base-v2, multi-qa-mpnet-base-dot-v1, all-distilroberta-v1, all-MiniLM-L12-v2, and all-MiniLM-L6-v2. The best results were achieved for the all-mpnet-base-v2.
- (3) **CB-PTSD classification.** We tested various PCL-5 cutoffs in the range of [27, 33] and identified the cutoff of 31 as the best value for the developed model.
- (4) **Neural network architectures.** We examined various neural network architectures for the DFNN model with the following parameters: number of hidden layers [1, 3]; hidden layer width [12, 256]; batch size: [10, 256]; optimizer: Adam; activation function: ReLU; and a Sigmoid output activation function.
